# Supplementary material for: Cognitive function in a general population of men and women: a cross sectional study in the European Investigation of Cancer–Norfolk cohort (EPIC-Norfolk)
Source: BMC Geriatr. 2014 Dec 19;14:142. doi: 10.1186/1471-2318-14-142 (PMC4349767; doi:10.1186/1471-2318-14-142)
Supplement: Supplementary file 3 — Additional file 3: Table S2: Cognitive scores stratified by age in women in EPIC-Norfolk 3. (XLSX 25 KB) [file 12877_2014_1084_MOESM3_ESM.xlsx]

## Sheet: Mean, Median IQR
Table S2 : Cognitive scores stratified by age in women in EPIC-Norfolk 3
	<60 Years	60 to <65 Years	65 to < 70 Years	70 to < 75 Years	75 to <80 Years	80 and over
EMSE Items
Frequency (N)	661	1241	971	815	604	389
Mean (SD)	33.9 (2.3)	33.3 (2.5)	32.9 (2.7)	32.2 (3.1)	31.7 (3.1)	30.9 (3.9)
Median (IQR)	34 (33, 35)	34 (32, 35)	33 (32, 35)	33 (31, 34)	32 (30, 34)	32 (29, 33)
Range	9, 37	6, 37	14, 37	4, 37	19, 37	6, 36
PW Accuracy
Frequency (N)	657	1237	969	811	599	377
Mean (SD)	15.6 (6.0)	14.4 (5.5)	13.5 (5.9)	11.9 (5.6)	11.3 (5.5)	9.6 (6.5)
Median (IQR)	16 (12, 20)	14 (11, 18)	14 (10, 17)	12 (8,16)	12 (8, 15)	9 (5, 14)
Range	-26, 36	-8, 36	-16, 54	-14, 30	-7, 26	-28, 35
HVLT
Frequency (N)	639	1213	929	778	571	346
Mean (SD)	28.9 (4.3)	27.5 (4.6)	26.6 (4.9)	24.7 (5.4)	24.1 (5.5)	21.8 (6.3)
Median (IQR)	30 (26, 32)	28 (25, 31)	27 (23, 30)	25 (21, 29)	24( 20, 28)	22 (18, 27)
Range	12, 36	5, 36	1, 36	8, 36	8, 35	0, 36
FTMS
Frequency (N)	596	1109	837	688	504	277
Mean (SD)	17.4 (4.1)	16.5 (4.3)	15.9 (4.0)	14.6 (4.2)	13.9 (4.6)	12.8 (4.6)
Median (IQR)	18 (15, 20)	17 (14, 19)	16 (14, 18)	15 (12, 17)	14 (11, 17)	14 (10, 16)
Range	0, 26	0, 26	0, 26	0, 25	0, 26	0, 23
VST (Reaction Time)
Frequency (N)	556	1086	832	686	492	276
Mean (SD)	2171 (342)	2165 (368)	2199 (454)	2239 (405)	2357 (692)	2448 (447)
Median (IQR)	2148 (1948, 2352)	2138 (1953, 2354)	2173 (1958, 2399)	2201 (2003, 2441)	2274 (2068, 2533)	2419 (2101, 2712)
Range	1207, 3682	710, 5992	1054, 8695	459, 6214	1271, 12869	1519, 4860
NART Error Score
Frequency (N)	632	1218	948	786	563	357
Mean (SD)	16.0 (8.9)	16.7 (9.2)	16.4 (9.9)	17.6 (9.5)	16.8 (9.7)	15.9 (9.5)
Median (IQR)	14 (9, 23)	15 (9, 24)	15 (8, 24)	16 (10, 24)	16 (9, 24)	14 (9, 24)
Range	1, 50	1, 46	0, 47	0, 46	0, 50	0, 44
